# Supplementary material
Source: publisher site journal article supplement (https://www.dovepress.com/get_supplementary_file.php?f=275003.docx)
Supplement: Supplementary file 1 [file get_supplementary_file.php]

**
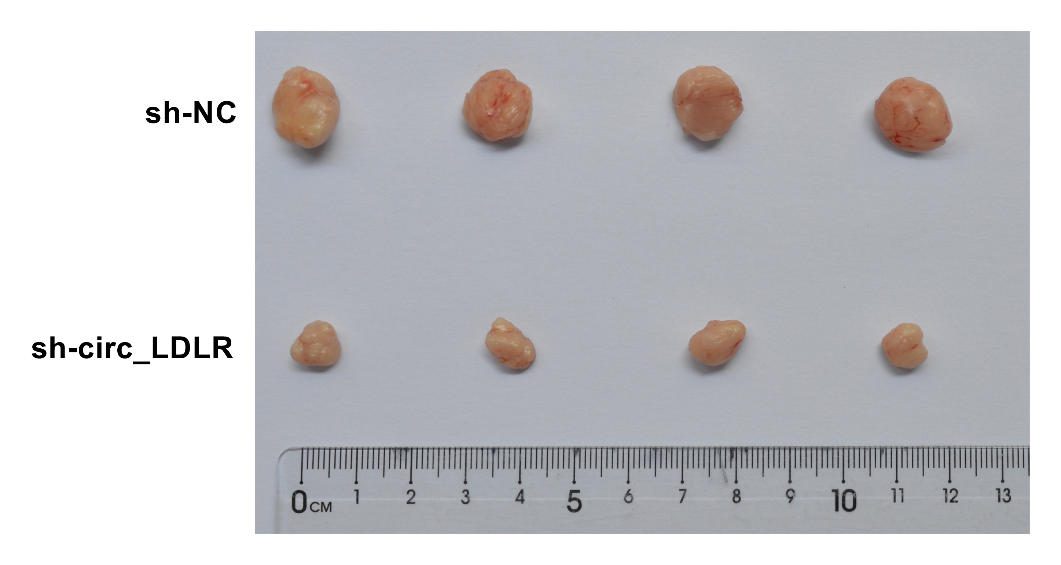
**

**Supplementary Fig. 1 Images of xenograft tumors generated from Nude mice injected with Hep3B cells stably expressing sh-NC or sh-circ_LDLR.**
